# Supplementary material for: Spatial scenery of congenital syphilis in Brazil between 2007 and 2018: an ecological study
Source: HighWire-hosted journal article supplement (doi:10.1136/bmjopen-2021-058270), 2022-04-01
Supplement: bmjopen-2021-058270supp001_data_supplement.pdf [file bmjopen-2021-058270supp001_data_supplement.pdf]

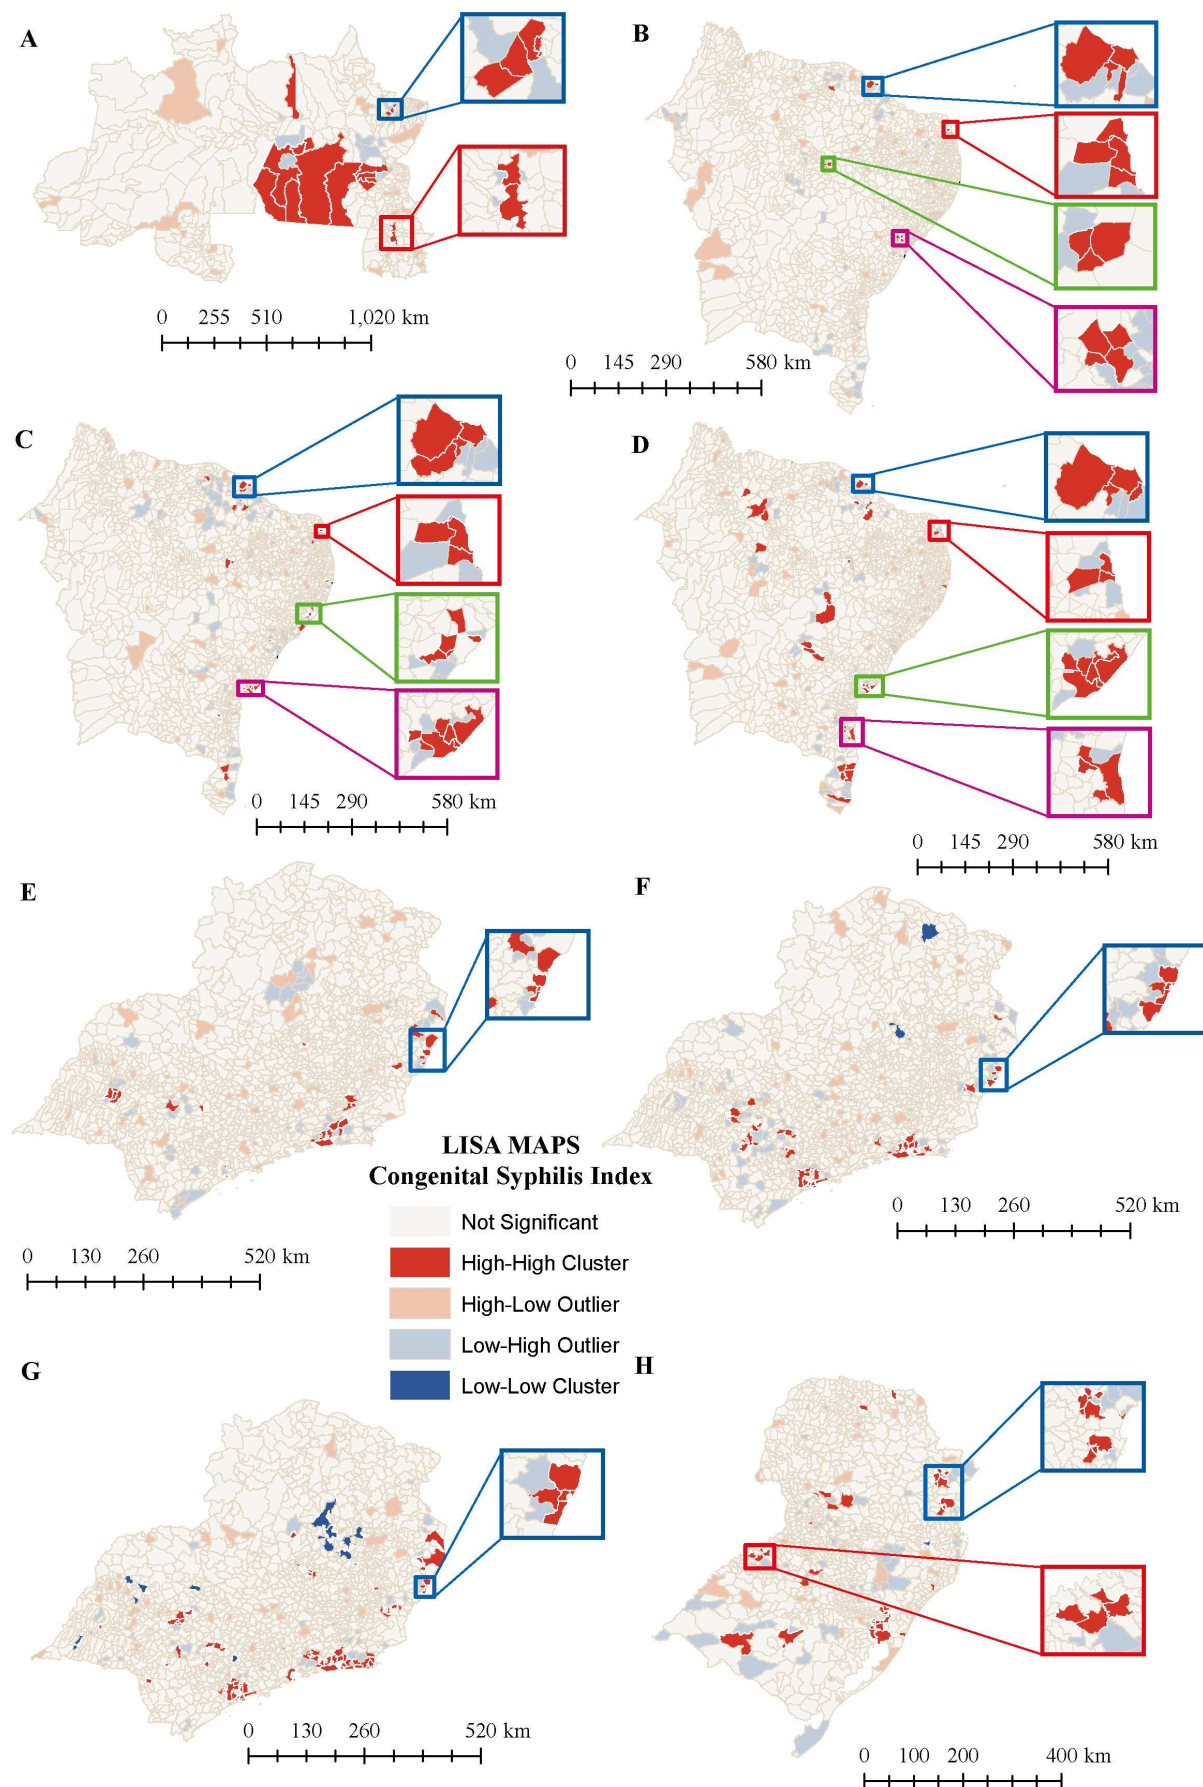

Online Supplemental Figure 1 - Magnification of the clusterings pointed in LISA maps in the states of Pará and Tocantins (Suppl. Fig. 1A - blue and red boxes, respectively); Piauí and Sergipe (Suppl. Fig. 1B - green and purple boxes, respectively); Rio Grande do Norte and Ceará (Suppl. Fig. 1B, 1C, 1D - red and blue boxes, respectively); Alagoas (Suppl. Fig. 1C - green box), Bahia (Suppl. Fig. 1C - purple box); and Suppl. Fig. 1D - green and purple boxes, respectively); Espírito Santo (Suppl. Fig. 1E; 1F; 1G - blue box); Santa Catarina and Paraná (Suppl. Fig. 1H - blue box) and Rio Grande do Sul (Suppl. Fig. 1H - red box)
