# Supplementary material for: Spatial scenery of congenital syphilis in Brazil between 2007 and 2018: an ecological study
Source: HighWire-hosted journal article supplement (doi:10.1136/bmjopen-2021-058270), 2022-04-01
Supplement: bmjopen-2021-058270supp002_data_supplement.pdf [file bmjopen-2021-058270supp002_data_supplement.pdf]

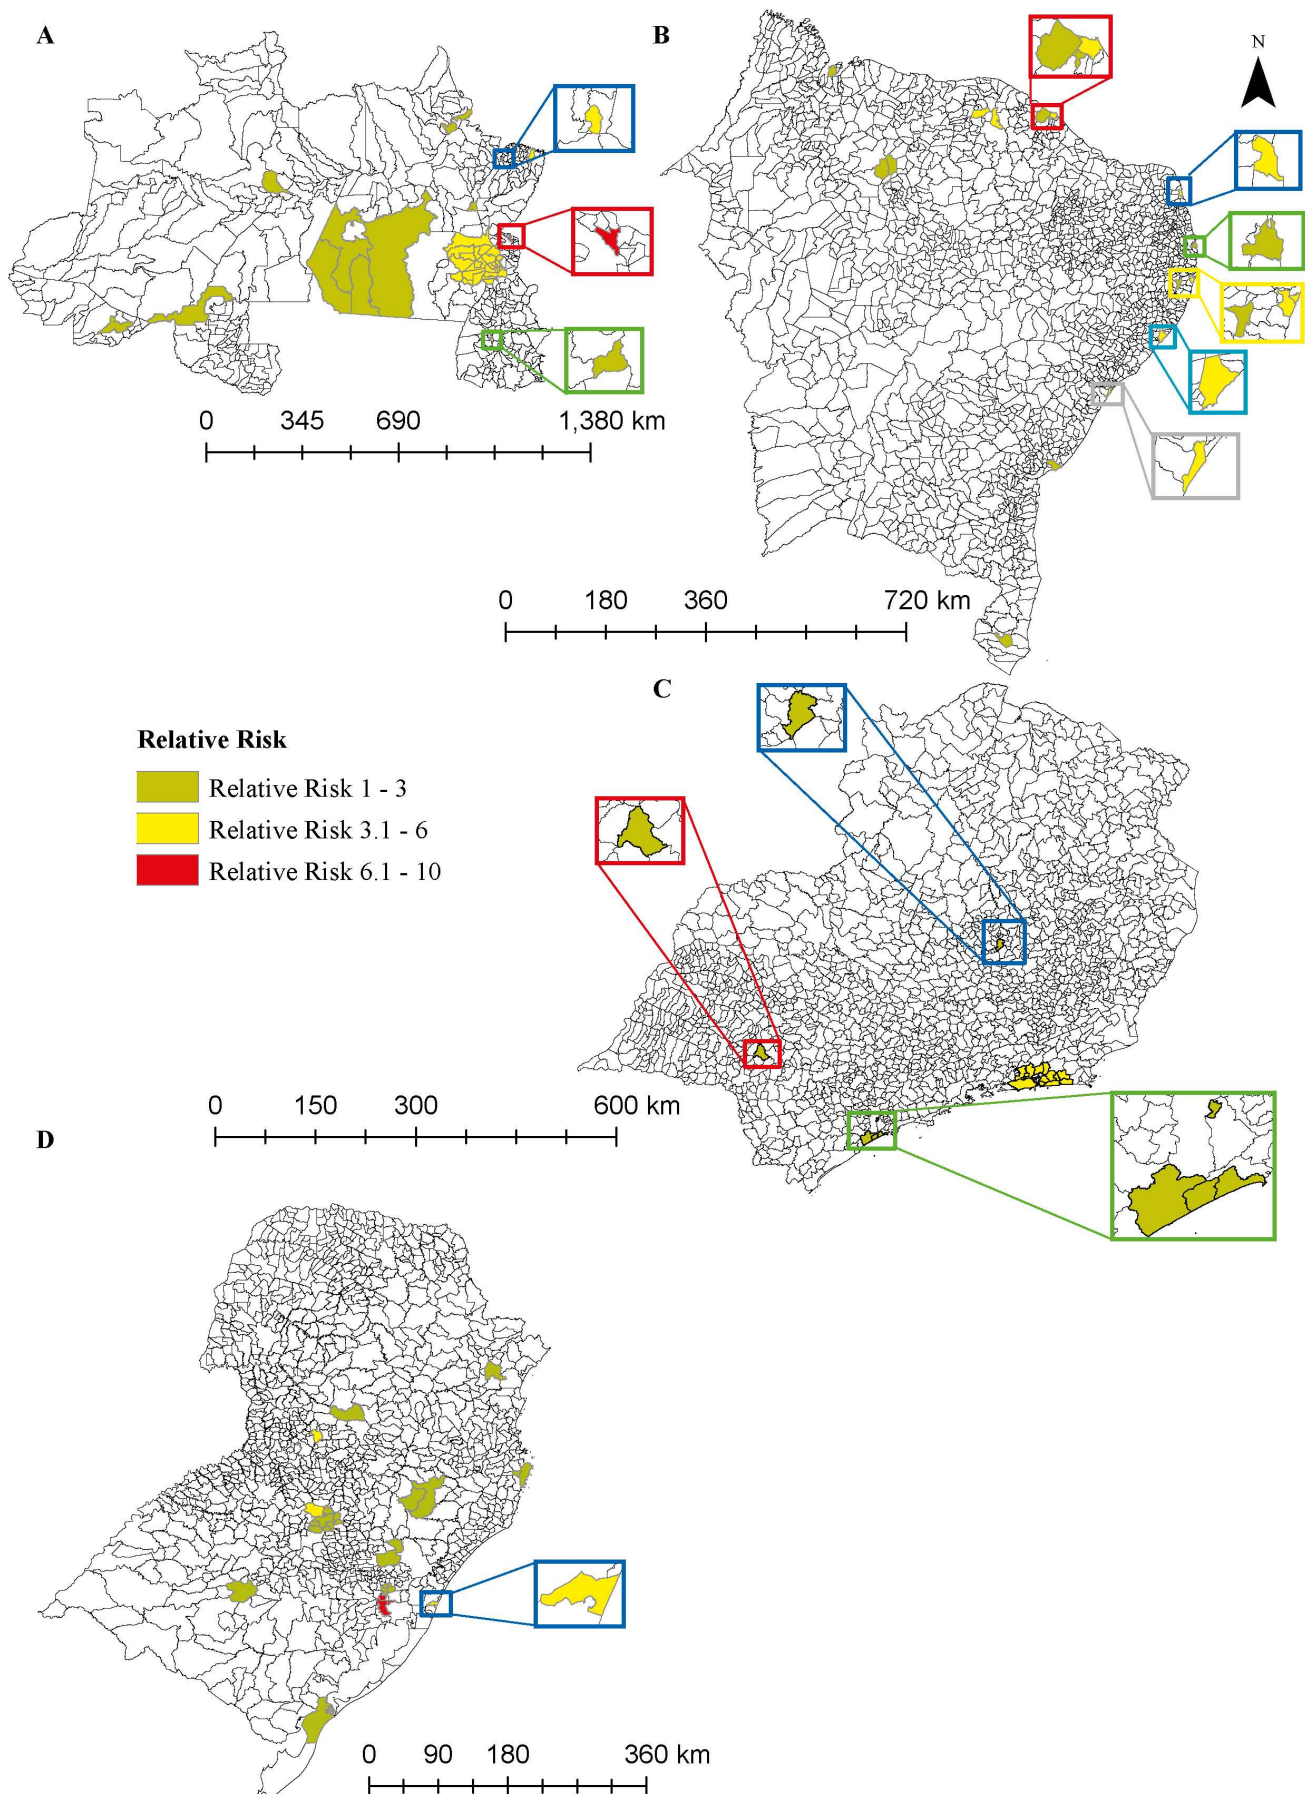

Online Supplemental Figure 2 - Magnification of the spatial risk zones for the CS in the states of Pará (Suppl. Fig. 2A - blue box), Ceará Tocantins (Suppl. Fig. 2A - red and green boxes), Ceará (Suppl. Fig. 2B - red box), Rio Grande do Norte (Suppl. Fig. 2B - blue box), Pernambuco (Suppl. Fig. 2B - green box), Recife and Olinda (Suppl. Fig. 2B - yellow box), Alagoas (Suppl. Fig. 2B - cyan green box), Sergipe (Suppl. Fig. 2B - grey box), Minas Gerais (Suppl. Fig. 2C - blue box), São Paulo (Suppl. Fig. 2C - red and green boxes) and Porto Alegre (Suppl. Fig. 2D - blue box).
