# Supplementary material for: Spatial scenery of congenital syphilis in Brazil between 2007 and 2018: an ecological study
Source: HighWire-hosted journal article supplement (doi:10.1136/bmjopen-2021-058270), 2022-04-01
Supplement: bmjopen-2021-058270supp003_data_supplement.pdf [file bmjopen-2021-058270supp003_data_supplement.pdf]

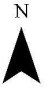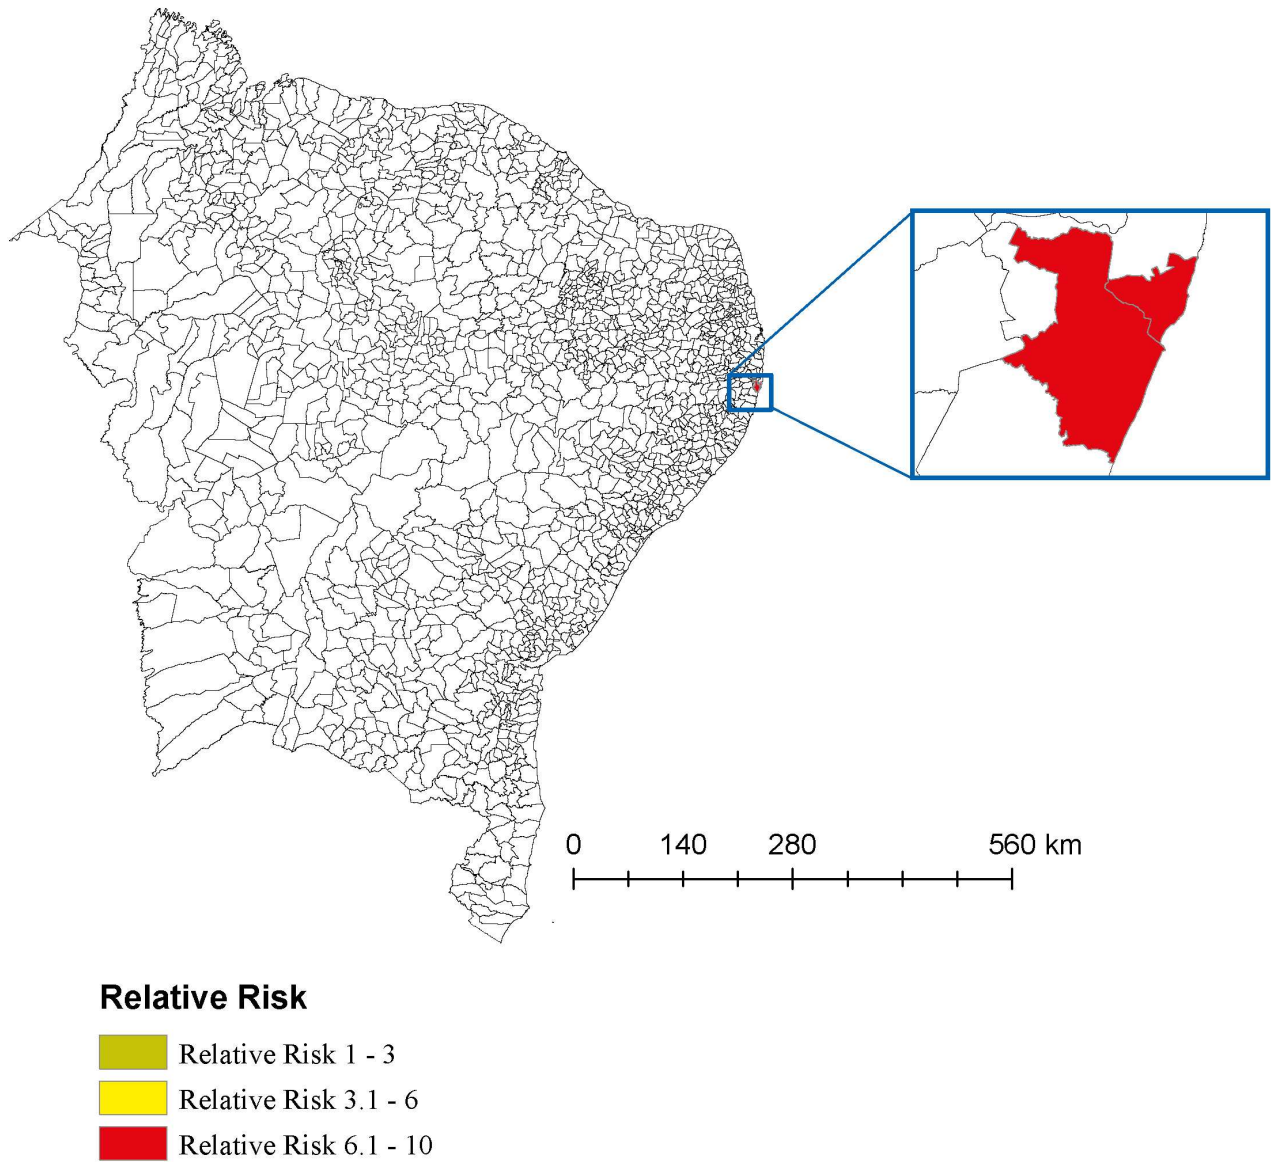

Online Supplemental Figure 3 - Magnification of the spatiotemporal risk zones for CS in the state of Pernambuco (blue box).
